# Supplementary material for: Properties of CrOx/MCM-41 and Its Catalytic Activity in the Reaction of Propane Dehydrogenation in the Presence of CO2
Source: MDPI journal article supplement (doi:10.3390/catal13050906), 2023-05-19
Supplement: s1 [file s1]

## Supplementary Materials

### Properties of $\text{CrO}_x/\text{MCM-41}$ and its catalytic activity in the reaction of propane dehydrogenation in the presence of $\text{CO}_2$

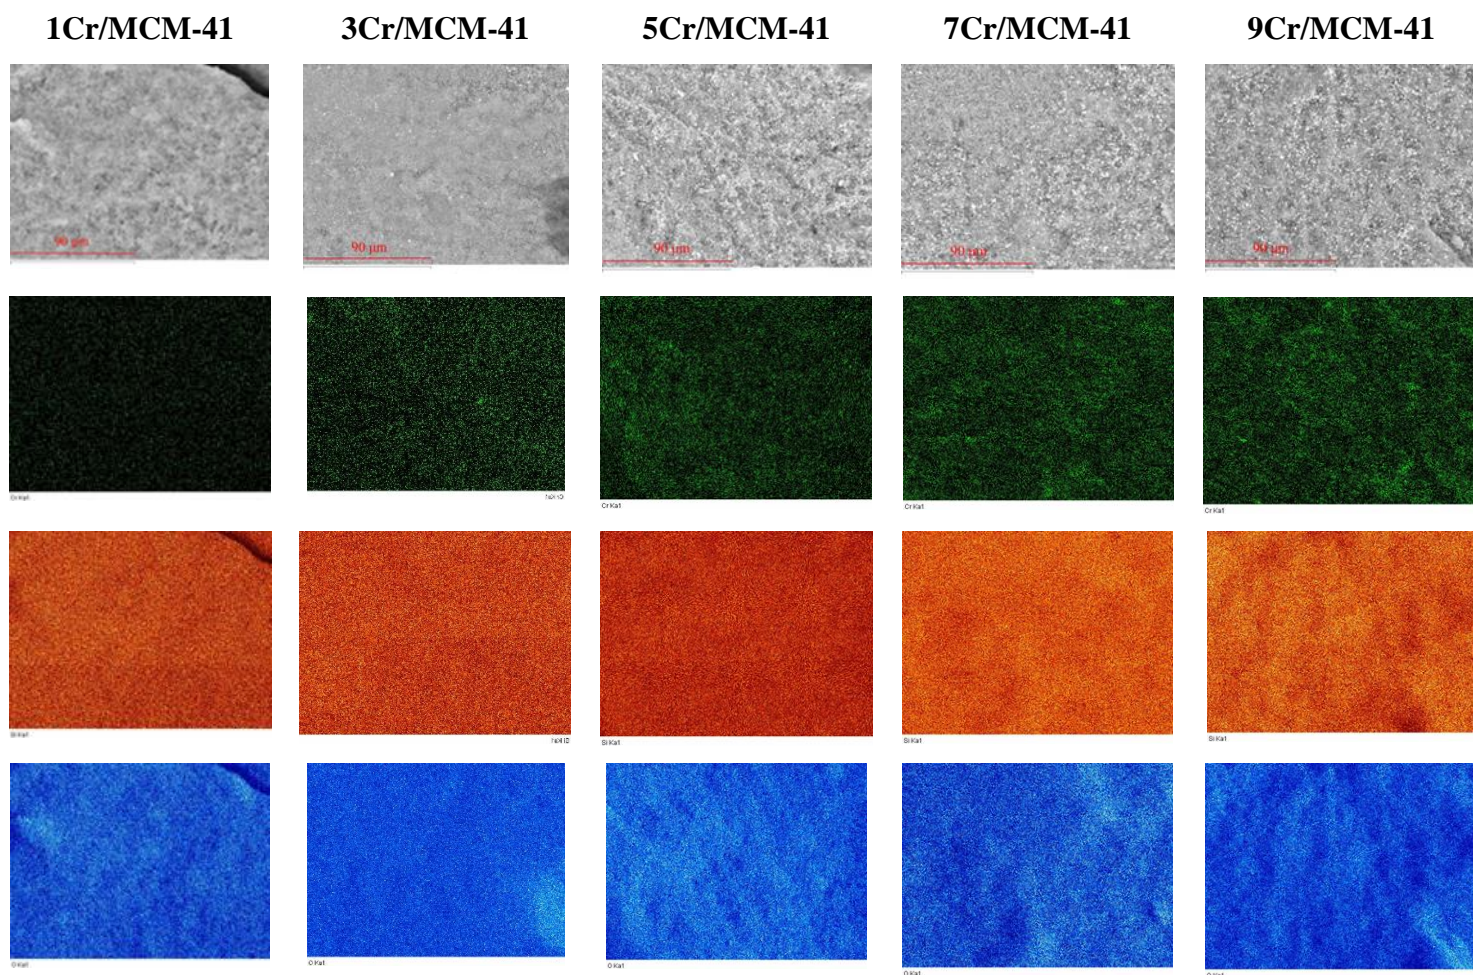

**Figure S1.** SEM images (the upper row) and chromium (the 2nd row), silicon (the 3rd row), oxygen (the lower row) distribution maps for the Cr/MCM-41 catalysts.

**1Cr/MCM-41**

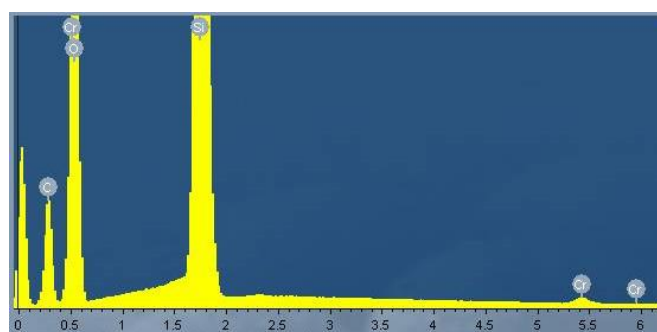

**3Cr/MCM-41**

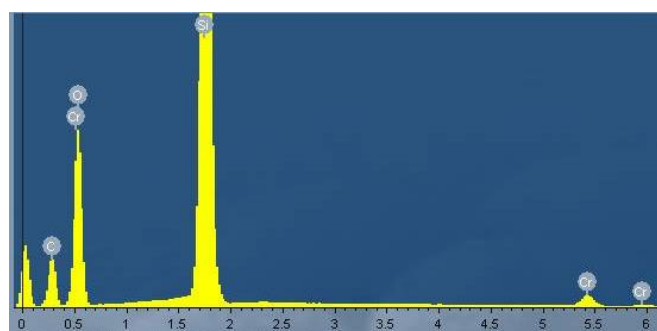

**5Cr/MCM-41**

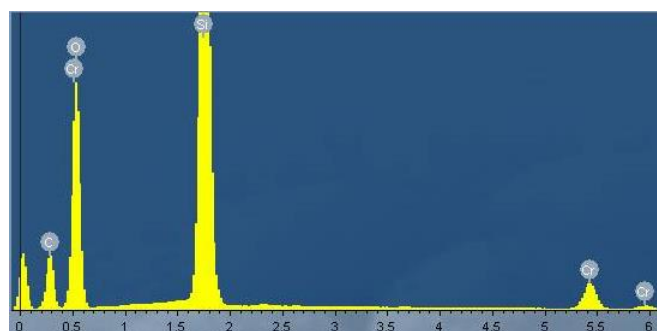

**7Cr/MCM-41**

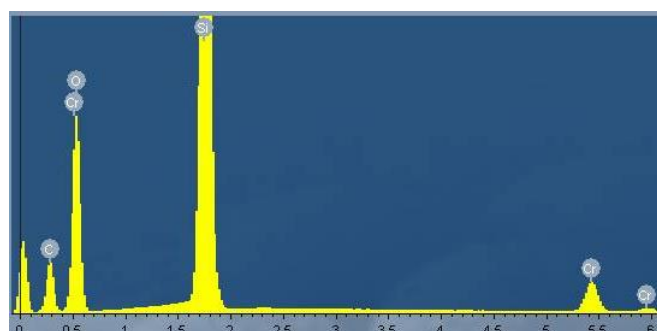

**9Cr/MCM-41**

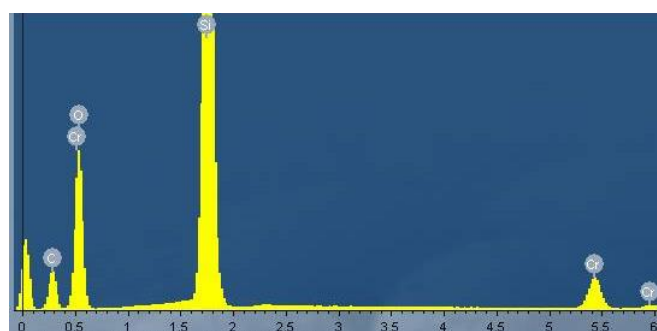

**Figure S2.** EDS of Cr/MCM-41 catalysts.
